# Supplementary material for: Ultraconserved Long Non-Coding RNA Uc.112 is Abnormally Expressed in Childhood Acute Lymphoblastic Leukemia Subtypes
Source: Preprints.org preprint supplement (doi:10.20944/preprints201810.0163.v1), 2018-10-08
Supplement: Supplementary file 1 [file supplementary]

Supplementary Table 1: Expression data and patient features.

| sample | age | WBC | immuno | hyperd | t(12;21) | relapse | death | status | EFS | OS | uc.112 | uc.122 | uc.160 | uc.262 |
| --- | --- | --- | --- | --- | --- | --- | --- | --- | --- | --- | --- | --- | --- | --- |
| 1 | 1 | 1 | 1 | 1 | 1 | 1 | 1 | 1 | 7,340 | 7,34018 | 0,97562 | 1,61296 | 2,97941 | 0,10758 |
| 2 | 1 | 1 | 1 | 1 | 1 | 1 | 1 | 1 | 9,049 | 9,0486 | 0,59095 | 2,62076 | 1,75761 | 0,14054 |
| 3 | 2 | 1 | 1 | 1 | 1 | 1 | 1 | 1 | 11,6304 | 11,6304 | 0,19116 | 0,5962 | 1,71002 | 0,14216 |
| 4 | 2 | 1 | 1 | 1 | 1 | 1 | 1 | 1 | 0,129 | 0,12868 | 0,33052 | 2,92431 | 7,27767 | 0,14741 |
| 5 | 1 | 1 | 1 | 1 | 1 | 1 | 1 | 1 | 8,063 | 8,06297 | 0,41198 | 3,25897 | 5,07122 | 0,17008 |
| 6 | 1 | 2 | 1 | 1 | 1 | 2 | 1 | 2 | 7,565 | 8,52841 | 0,53547 | 3,69252 | 3,06916 | 0,24354 |
| 7 | 1 | 2 | 1 | 2 | 1 | 1 | 1 | 1 | 7,313 | 7,3128 | 1,43257 | 3,1291 | 4,68663 | 0,27102 |
| 8 | 2 | 2 | 1 | 1 | 1 | 2 | 1 | 2 | 2,825 | 8,48186 | 0,13541 | 1,33796 | 1,50004 | 0,28734 |
| 9 | 1 | 2 | 1 | 2 | 1 | 1 | 2 | 2 | 0,433 | 0,43258 | 0,45219 | 2,38359 | 1,0453 | 0,32665 |
| 10 | 2 | 2 | 1 | 1 | 1 | 1 | 2 | 2 | 0 | 0,03833 | 0,05358 | 0,68941 | 1,29742 | 0,42265 |
| 11 | 1 | 2 | 1 | 1 | 2 | 1 | 1 | 1 | 7,754 | 7,75359 | 0,60881 | 2,38786 | 3,41304 | 0,49156 |
| 12 | 1 | 2 | 1 | 1 | 2 | 2 | 2 | 2 | 2,056 | 9,2293 | 0,15943 | 2,45544 | 1,21069 | 0,58082 |
| 13 | 1 | 1 | 1 | 2 | 1 | 1 | 1 | 1 | 7,61944 | 7,61944 | 0,89168 | 2,11961 | 11,4123 | 0,64474 |
| 14 | 1 | 1 | 1 | 1 | 2 | 1 | 1 | 1 | 7,053 | 7,0527 | 0,05954 | 1,8506 | 1,70844 | 0,66669 |
| 15 | 1 | 1 | 1 | 2 | 1 | 1 | 2 | 2 | 3,981 | 3,98084 | 1,30705 | 1,54473 | 3,05633 | 0,74396 |
| 16 | 1 | 1 | 1 | 1 | 1 | 1 | 1 | 1 | 11,729 | 11,729 | 0,17897 | 2,15889 | 0,95918 | 0,75084 |
| 17 | 1 | 1 | 1 | 2 | 1 | 1 | 1 | 1 | 8,25462 | 8,25462 | 0,94636 | 1,46192 | 4,7229 | 0,80047 |
| 18 | 1 | 1 | 1 | 2 | 1 | 1 | 1 | 1 | 0,41889 | 0,41889 | 1,46575 | 1,68176 | 6,2801 | 0,80055 |
| 19 | 1 | 2 | 1 | 1 | 1 | 1 | 1 | 1 | 8,884 | 8,88433 | 0,30902 | 0,74513 | 1,83802 | 0,94583 |
| 20 | 1 | 1 | 1 | 1 | 2 | 1 | 1 | 1 | 8,227 | 8,22724 | 0,21741 | 0,50914 | 0,79238 | 1,04949 |
| 21 | 1 | 2 | 1 | 1 | 1 | 2 | 2 | 2 | 2,30801 | 2,37919 | 0,35928 | 2,32714 | 1,63424 | 1,13691 |
| 22 | 1 | 1 | 1 | 2 | 1 | 1 | 1 | 1 | 8,068 | 8,06845 | 1,10596 | 3,31821 | 4,75475 | 1,17582 |
| 23 | 1 | 1 | 1 | 2 | 1 | 1 | 1 | 1 | 8,057 | 8,05749 | 0,79011 | 2,39278 | 2,47832 | 1,51971 |
| 24 | 2 | 2 | 1 | 1 | 1 | 1 | 2 | 2 | **0,000** | 0,3039 | 0,51445 | 4,02448 | 6,95414 | 1,55333 |
| 25 | 2 | 1 | 1 | 2 | 1 | 1 | 2 | 2 | 0 | 0,01369 | 0,6963 | 0,7695 | 2,08991 | 1,9098 |
| 26 | 1 | 1 | 1 | 1 | 2 | 1 | 1 | 1 | 9,2293 | 9,2293 | 0,3022 | 1,02862 | 7,20431 | 2,6079 |
| 27 | 1 | 2 | 1 | 1 | 1 | 2 | 1 | 2 | 2,609 | 8,98836 | 0,04913 | 1,60757 | 0,92048 | 3,05031 |
| 28 | 1 | 2 | 1 | 1 | 2 | 1 | 1 | 1 | 11,3895 | 11,3895 | 0,2614 | 1,02819 |  |  |
| 29 | 1 | 1 | 1 | 1 | 1 | 1 | 1 | 1 | 6,349 | 6,34908 | 0,19852 | 1,052 |  |  |
| 30 | 1 | 1 | 1 | 1 | 2 | 1 | 1 | 1 | 10,5791 | 10,5791 | 1,06033 | 1,1516 |  |  |
| 31 | 2 | 1 | 2 |  |  | 1 | 1 | 1 | 6,64476 | 6,64476 | 3,24741 | 5,19442 | 32,1118 | 0,06947 |
| 32 | 1 | 2 | 2 |  |  | 1 | 1 | 1 | 11,4196 | 11,4196 | 1,15418 | 3,3102 | 7,01576 | 0,10698 |
| 33 | 2 | 2 | 2 |  |  | 1 | 2 | 2 | 0 | 0,01643 | 1,71348 | 1,56278 | 0,60073 | 0,17504 |
| 34 | 1 | 2 | 2 |  |  |  |  |  |  |  | 6,07178 | 2,19394 | 4,84993 | 0,18169 |
| 35 | 2 | 1 | 2 |  |  | 1 | 1 | 1 | 1,51129 | 1,51129 | 0,02795 | 1,74764 | 1,94094 | 0,24145 |
| 36 | 2 | 2 | 3 |  |  | 1 | 1 | 1 | 6,63655 | 6,63655 | 0,36233 | 0,88267 | 1,16824 | 0,25286 |
| 37 | 2 | 2 | 2 |  |  | 1 | 1 | 1 | 9,82067 | 9,82067 | 2,28948 | 2,14324 | 2,1993 | 0,339 |
| 38 | 1 | 1 | 2 |  |  | 2 | 2 | 2 | 1,58795 | 1,74949 | 25,1919 | 7,59378 | 26,7091 | 0,34067 |
| 39 | 1 | 1 | 2 |  |  | 1 | 1 | 1 | 11,0335 | 11,0335 | 2,52135 | 10,28 | 3,34934 | 0,34832 |
| 40 | 2 | 1 | 2 |  |  | 1 | 1 | 1 | 8,52567 | 8,52567 | 1,39271 | 1,67469 | 4,75362 | 0,35127 |
| 41 | 1 | 1 | 2 |  |  | 1 | 1 | 1 | 12,7091 | 12,7091 | 0,85617 | 2,50207 | 3,84362 | 0,35762 |
| 42 | 2 | 2 | 2 |  |  | 1 | 1 | 1 | 8,6078 | 8,6078 | 0,90169 | 1,55413 | 1,12307 | 0,573 |
| 43 | 2 | 2 | 2 |  |  | 2 | 2 | 2 | 1,53867 | 1,71116 | 1,52886 | 2,25371 | 5,23076 | 0,57335 |
| 44 | 2 | 2 | 2 |  |  | 1 | 1 | 1 | 4,09582 | 4,09582 | 0,83758 | 1,71515 | 2,74562 | 0,69878 |
| 45 | 2 | 2 | 3 |  |  | 1 | 1 | 1 | 7,40589 | 7,40589 | 2,37576 | 2,19338 | 4,69798 | 0,71046 |
| 46 |  |  | 2 |  |  |  |  |  |  |  | 0,06872 | 0,28782 | 20,7157 | 0,87447 |
| 47 | 2 | 2 | 3 |  |  | 1 | 1 | 1 | 1,5989 | 1,5989 | 0,22844 | 1,52952 | 1,18085 | 0,95044 |
| 48 | 2 | 1 | 2 |  |  | 1 | 1 | 1 | 0 | 0,10678 | 1,92464 | 3,63824 | 4,22469 | 1,3502 |
| 49 | 2 | 2 | 2 |  |  | 1 | 1 | 1 | 6,74606 | 6,74606 | 0,1397 | 1,46443 | 2,85969 | 1,36192 |
| 50 | 1 | 2 | 2 |  |  | 1 | 1 | 1 | 1,22656 | 1,22656 | 0,52379 | 2,26011 | 3,16281 | 1,85356 |
| 51 | 2 | 1 | 2 |  |  |  |  |  |  |  | 1,57798 | 10,9178 | 5,08751 | 2,03034 |
| 52 | 2 | 2 | 2 |  |  | 2 | 1 | 2 | 2,02327 | 9,02669 | 0,69288 | 1,1811 | 0,30772 |  |
| 53 | 1 | 2 | 2 |  |  | 1 | 1 | 1 | 10,5681 | 10,5681 | 1,83084 | 2,82982 | 1,3219 |  |
| 54 | 1 | 2 | 2 |  |  | 1 | 1 | 1 | 12,3176 | 12,3176 | 0,44409 | 1,10515 | 1,64466 |  |
| 55 | 1 | 2 | 2 |  |  | 1 | 2 | 2 | 0 | 0,09582 | 0,31624 | 1,45503 | 2,07678 |  |
| 56 | 2 | 2 | 2 |  |  | 1 | 1 | 1 | 8,35318 | 8,35318 | 1,30431 | 2,10389 | 2,36879 |  |
| 57 | 2 | 1 | 2 |  |  | 1 | 1 | 1 | 6,60643 | 6,60643 | 0,21659 | 1,52393 | 5,92001 |  |
| 58 | 1 | 2 | 2 |  |  | 1 | 1 | 1 | 11,4634 | 11,4634 | 0,26933 | 5,20537 | 6,08715 |  |
| 59 | 1 | 2 | 2 |  |  | 1 | 2 | 2 | 1,01574 | 1,01574 | 0,47775 | 4,3996 | 8,16639 |  |
| 60 | 2 | 2 | 2 |  |  | 1 | 1 | 1 | 7,09377 | 7,09377 | 1,0488 | 3,92957 | 9,38496 |  |
| 61 | 1 | 2 | 2 |  |  | 2 | 2 | 2 | 0,71732 | 1,40726 | 10,3719 | 3,26059 | 13,0301 |  |
| 62 |  |  |  |  |  |  |  |  |  |  | 1,61984 | 7,49241 | 14,0671 |  |

Age: 1= 1 to 9 years, 2= <1 and >9 years; WBC: white blood cell count at diagnosis, 1= < 50,000 mm3, 2= > 50,000 mm3, immune: immunophenotype, 1= B-ALL, 2= T-ALL, hyperd: hyperdiploid karyotype, t(12;21), relapse, death, 1=positive, 2= negative; status for relapse or death, 1=positive, 2= negative; EFS: event free survival; OS: overall survival.
