# Supplementary material for: Ultraconserved Long Non-Coding RNA Uc.112 is Abnormally Expressed in Childhood Acute Lymphoblastic Leukemia Subtypes
Source: Preprints.org preprint supplement (doi:10.20944/preprints201810.0163.v1), 2018-10-08
Supplement: Supplementary file 3 [file sup table 2.docx]

**Table Supplementary 2.** Primers sequences used in quantitative real time PCR.

| **Gene** | **Sequence** | | **Lenght** |
| --- | --- | --- | --- |
| *GUS1* | 5’ GAAAATATGTGGTTGGAGAGCTCATT/  CCGAGTGAAGATCCCCTTTTTA 3’ | 101pb | |
| *GAPDH2* | 5’AGATCCCTCCAAAATCAAGTGG/ GGCAGAGATGATGACCCTTTT 3’ | 130pb | |
| *uc.112* | 5’TGACAGCGAAACACACCTGTA/ CAACACTCTGTGCCCCATTA 3’ | 134pb | |
| *uc.122* | 5’ CAGCTGGGAAATTCTGGAGT/ ACTGACCCACATTTGGACCT 3’ | 116pb | |
| *uc.160* | 5’GGCTTCAATGCACTATTGCA/ AAACCCTCCCTTGCTGACA 3’ | 95pb | |
| *uc.252* | 5’GCTCATCACAGGACCCACA/ AAGCCCAGCCAATTAAGGA 3’ | 97pb | |
| *uc.262* | 5’AGGCTGAGGGTTCCTAATGA/ TGGTAATTGTTGCACCCTCTT 3’ | 110pb | |
| *uc.316* | 5’ATGGCTACATGGGCCATTA/ GCTGTGCAAGATGCACCA 3’ | 108pb | |

1*GUS* primers described by Mata et al., 2006; 2*GAPDH* primers described by Valente et al., 2009.
